# Supplementary material
Source: PubMed Central journal article supplement (PMC3961786)
Supplement: Supp_Fig1.pdf [file Supp_Fig1.pdf]

## Supplementary Data

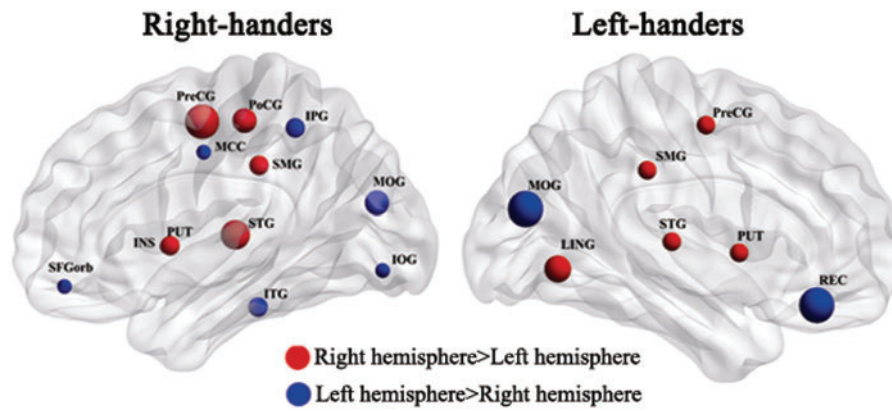

**SUPPLEMENTARY FIG. S1.** Node efficiency exhibited significant hemisphere-related differences in the two groups. The node sizes indicate the relative significance of the hemisphere-related differences in the node efficiency, the red colored nodes represent the rightward asymmetries, and the blue colored ones indicate the leftward asymmetries. Statistical significance was reached when  $p < 0.001$  using a Bonferroni correction.
