# Supplementary material
Source: PubMed Central journal article supplement (PMC3961786)
Supplement: Supp_Table1.pdf [file Supp_Table1.pdf]

SUPPLEMENTARY TABLE S1. CHINESE REVISED VERSION OF THE EDINBURGH HANDEDNESS INVENTORY

**Chinese Handedness Survey**

ID:.....Name:.....Age:.....Sex (m/f):.....  
 Nationality:.....Profession:.....Education (years): .....  
 Have you been forced to use your right hand to write or hold a chopstick when you were a child (Yes/No/I don't know).  
 Writing:.....holding chopstick:.....  
 The left-handed members in your family (including your parents and sibling):.....

The 10 questions below ask which hand you prefer to use in a number of different situations. Please tick one box for each question using +, ++. The + indicates you prefer to use either hand. The ++ indicates you prefer to use the left hand or the right hand. Please do not fill blanks out except the 10 items.

| <i>Items</i>                  | <i>Left</i>                                                           | <i>Right</i> |
|-------------------------------|-----------------------------------------------------------------------|--------------|
| 1. Writing                    |                                                                       |              |
| 2. Holding chopstick          |                                                                       |              |
| 3. Throwing                   |                                                                       |              |
| 4. Brushing                   |                                                                       |              |
| 5. Holding scissor            |                                                                       |              |
| 6. Striking a match           |                                                                       |              |
| 7. Threading a needle         |                                                                       |              |
| 8. Holding a hammer           |                                                                       |              |
| 9. Holding a racket           |                                                                       |              |
| 10. Washing face              |                                                                       |              |
| Total                         | Left                                                                  | Right        |
| Handedness score ( <i>S</i> ) | $100 * (\text{Left} + \text{Right}) / (\text{Right} - \text{Left}) =$ |              |

Left handedness,  $S < -40$ ; mixed handedness,  $-40 \leq S \leq 40$ ; right handedness,  $S > 40$ .
