# Supplementary material
Source: PubMed Central journal article supplement (PMC3961786)
Supplement: Supp_Table2.pdf [file Supp_Table2.pdf]

SUPPLEMENTARY TABLE S2. SIGNIFICANT ASYMMETRY SCORES FOR NODE EFFICIENCY IN RIGHT- AND LEFT HANDERS

| <i>Right handers: left &gt; right</i> |                          | <i>Right handers: right &gt; left</i> |                          |
|---------------------------------------|--------------------------|---------------------------------------|--------------------------|
| <i>Region</i>                         | <i>t-Value (p-value)</i> | <i>Region</i>                         | <i>t-Value (p-value)</i> |
| SFGorb                                | -4.11 (2.72e-04)         | PreCG                                 | -9.95 (1.23e-10)         |
| MCC                                   | -4.06 (3.12e-04)         | INS                                   | 3.90 (4.79e-04)          |
| MOG                                   | -5.44 (6.13e-06)         | PoCG                                  | 6.67 (1.85e-07)          |
| IOG                                   | -4.30 (1.58e-04)         | SMG                                   | 4.70 (5.09e-05)          |
| IPG                                   | -5.14 (1.43e-05)         | PUT                                   | 5.20 (1.21e-05)          |
| ITG                                   | -4.77 (4.18e-05)         | STG                                   | 7.48 (1.99e-08)          |
| <i>Left handers: left &gt; right</i>  |                          | <i>Left handers: right &gt; left</i>  |                          |
| <i>Region</i>                         | <i>t-Value (p-value)</i> | <i>Region</i>                         | <i>t-value (p-value)</i> |
| REC                                   | -6.32 (1.92e-06)         | PreCG                                 | 4.13 (4.11e-04)          |
| MOC                                   | -6.52 (1.20e-06)         | LING                                  | 5.42 (1.65e-05)          |
|                                       |                          | SMG                                   | 4.07 (4.74e-04)          |
|                                       |                          | PUT                                   | 4.23 (3.21e-04)          |
|                                       |                          | STG                                   | 3.80 (9.20e-04)          |

The threshold was  $p < 0.001$ . The identity of the abbreviation for each region can be found in Table 1.  
 Left, left hemisphere; right, right hemisphere.
